# Supplementary material for: Ozone deposition measurements over wheat fields in the North China Plain: variability and related factors of deposition flux and velocity
Source: Copernicus journal article supplement (doi:10.5194/acp-24-12323-2024), 2024-11-07
Supplement: Supplementary file 1 [file acp-24-12323-2024-supplement.pdf]

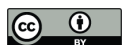

*Supplement of*

## **Ozone deposition measurements over wheat fields in the North China Plain: variability and related factors of deposition flux and velocity**

**Xiaoyi Zhang et al.**

*Correspondence to:* Wanyun Xu ([xuwy@cma.gov.cn](mailto:xuwy@cma.gov.cn)) and Xiaobin Xu ([xiaobin\\_xu@189.cn](mailto:xiaobin_xu@189.cn))

The copyright of individual parts of the supplement might differ from the article licence.

## List of Contents:

**Figure S1:** The satellite map of Gucheng site.

5 **Figure S2:** The influences of wind dead-bands ( $w_0$ ) on REA-H<sub>2</sub>O (a, d), REA-CO<sub>2</sub> (b, e) and REA-heat (c, f) fluxes in the daytime (a-c) and nighttime (d-f) from 12 February to 18 June, driven by EC raw data with a constant  $b = 0.60$ .  $F^*$  and  $F$  represent the REA fluxes with and without  $w_0$ , respectively. The linear regressions and correlation coefficients ( $r$ ) between  $F^*$  and  $F$  are inset in each figure, and  $n$  is the total number of the valid fluxes.

**Figure S3:** The comparison of O<sub>3</sub> concentration in the updraft and downdraft reservoirs during 10-11 May.

**Figure S4:** The results of multipoint calibration in the updraft and downdraft reservoirs.

10 **Figure S5:** The comparison of CO<sub>2</sub> (a), H<sub>2</sub>O (b) and heat (c) fluxes driven by EC theory and REA technique with a constant  $b = 0.60$  and  $w_0$ . The linear regressions and correlation coefficients ( $r$ ) between two fluxes are inset in each figure.

**Figure S6:** Timeseries of NO (a) and NO<sub>2</sub> (b) concentration from 18 March to 2 June.

**Figure S7:** Variations of O<sub>3</sub> flux (purple lines), concentration (orange lines) and NO<sub>2</sub> concentration (green lines) during (a) 8-13 April, (b) 27 April-1 May and (c) 18-22 May, with shades representing daytime hours.

15 **Figure S8:** Variations of nighttime averaged O<sub>3</sub> deposition velocity ( $V_d$ , blue circle lines), H<sub>2</sub>O flux ( $F_{H_2O}$ , green lines) and NO concentration (red lines) during 18 March-2 June.

**Table S1:** Winter wheat phenology at GC during 2022-2023.

**Table S2:** Summary of selected O<sub>3</sub> deposition velocity ( $V_d$ ).

20 **Table S3:** The relationships of O<sub>3</sub> deposition velocity ( $V_d$ ) and friction velocity ( $u_*$ ), soil volumetric water content (soil VWC) at different ranges of LAI.

**Supplementary Method:** The impact evaluation of the chemical reaction on O<sub>3</sub> flux measurement.

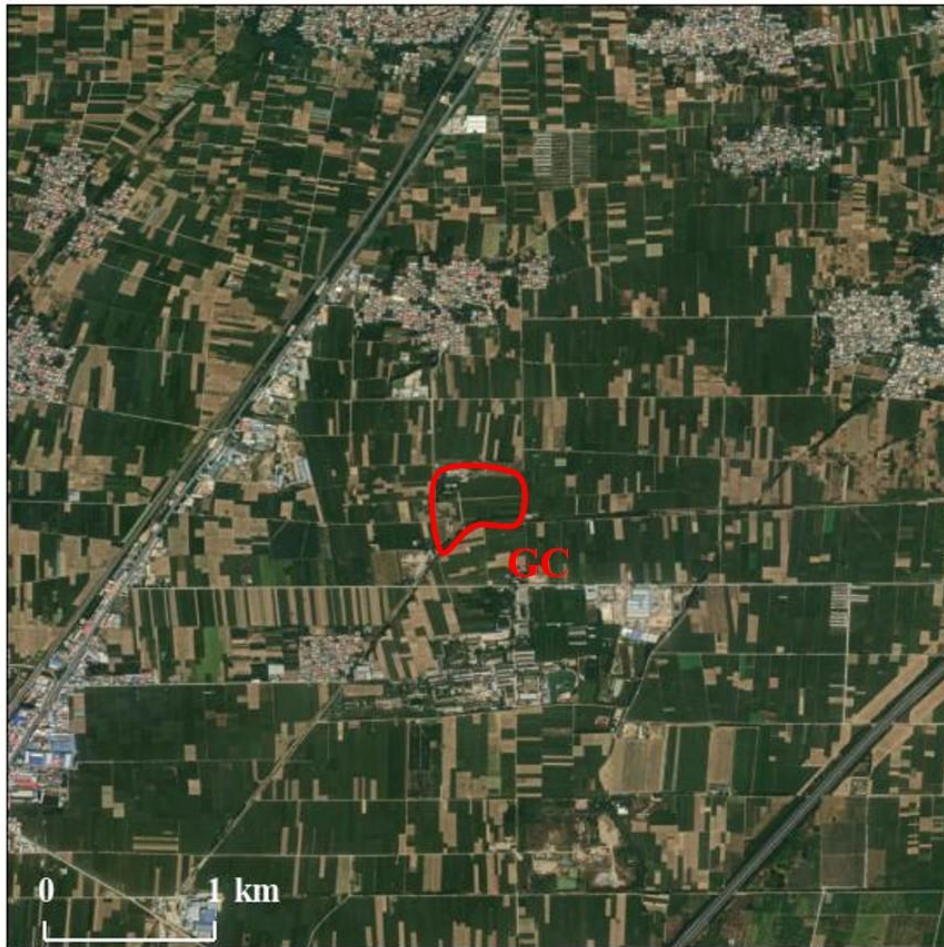

25 **Figure S1: The satellite map of Gucheng site (Generated by ArcGIS and python code).**

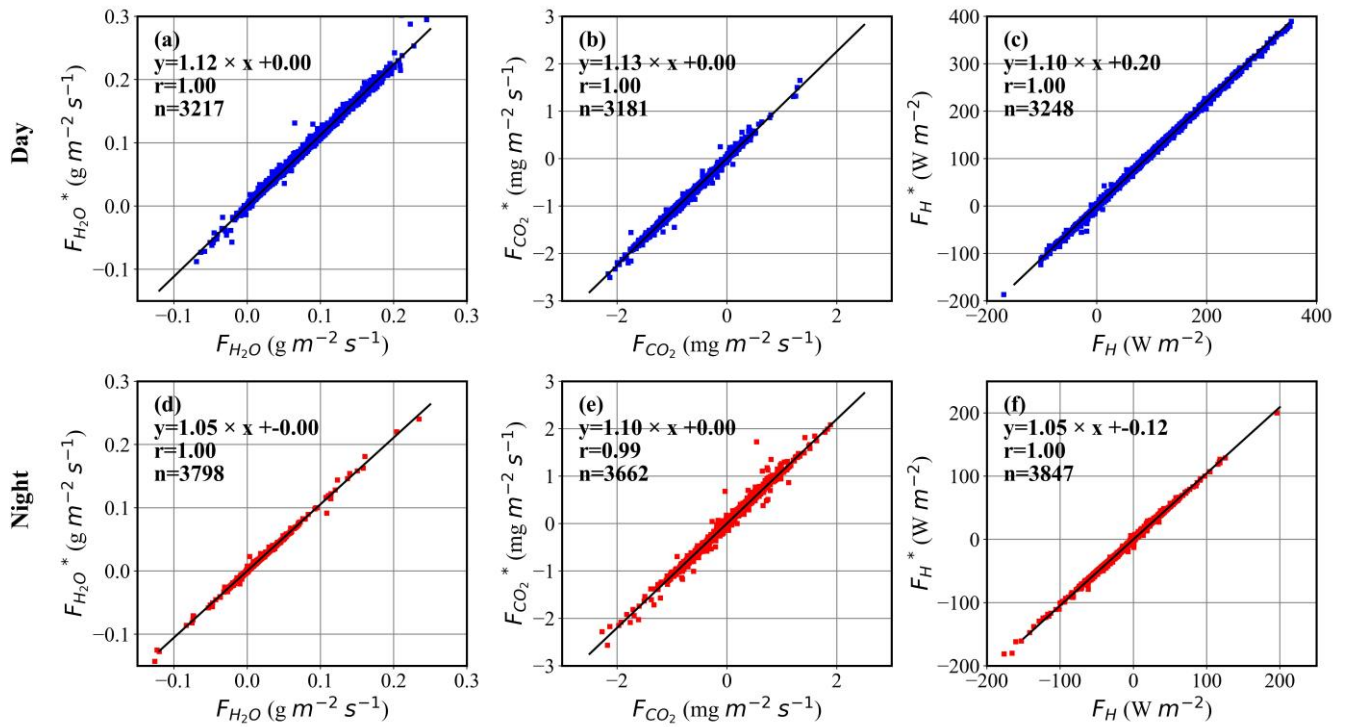

30 **Figure S2:** The influences of wind dead-bands ( $w_0$ ) on REA-H<sub>2</sub>O (a, d), REA-CO<sub>2</sub> (b, e) and REA-heat (c, f) fluxes in the daytime (a-c) and nighttime (d-f) from 12 February to 18 June, driven by EC raw data with a constant  $b = 0.60$ .  $F^*$  and  $F$  represent the REA fluxes with and without  $w_0$ , respectively. The linear regressions and correlation coefficients ( $r$ ) between  $F^*$  and  $F$  are inset in each figure, and  $n$  is the total number of the valid fluxes.

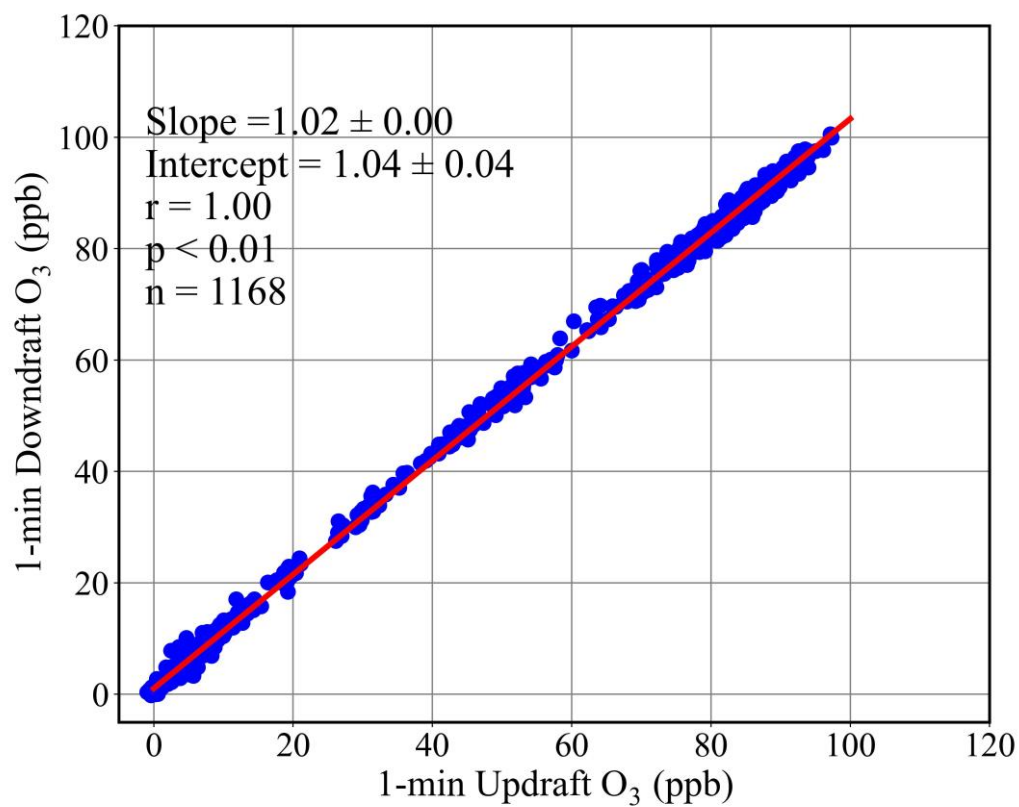

**Figure S3:** The comparison of O<sub>3</sub> concentration in the updraft and downdraft reservoirs during 10-11 May.

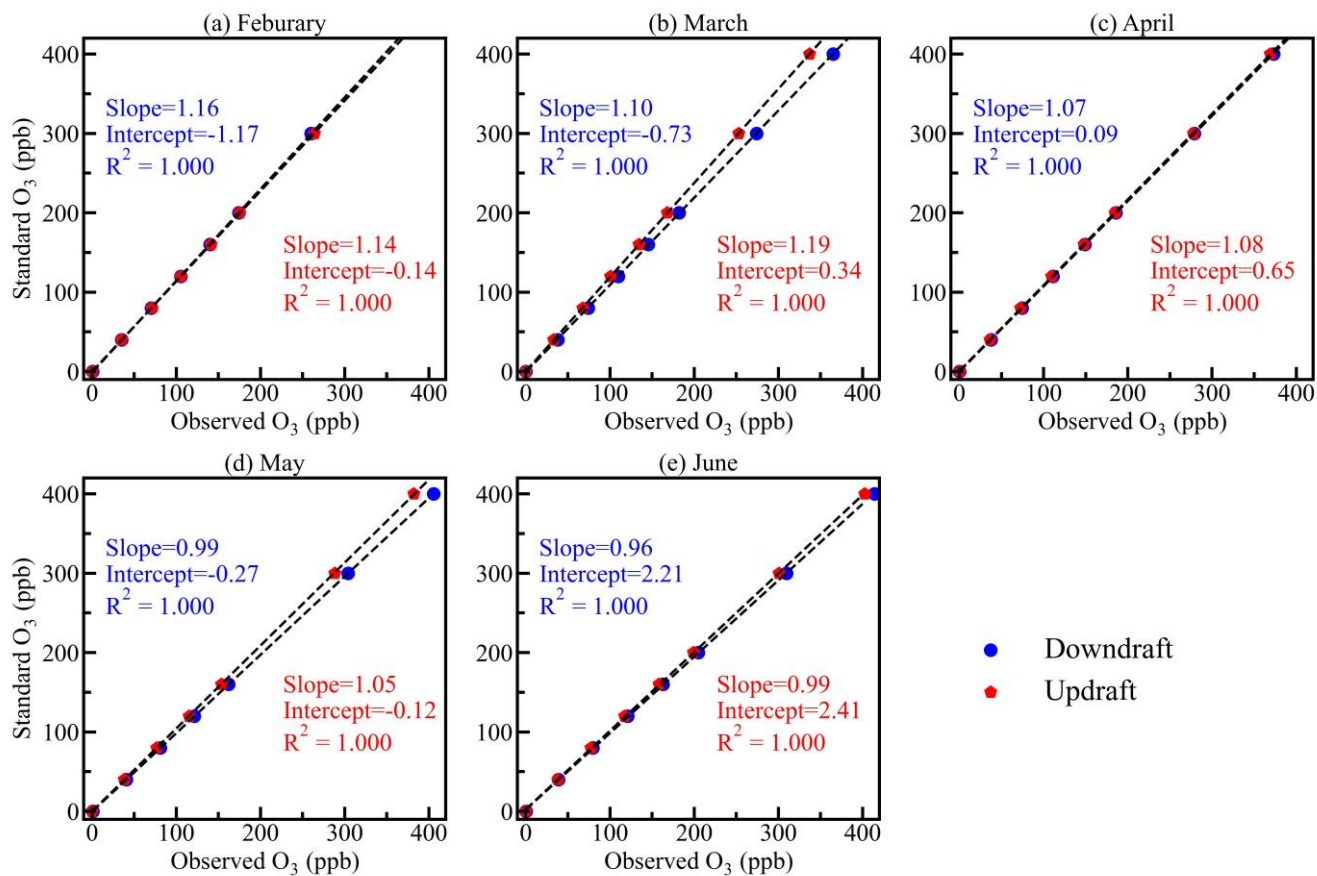

40 **Figure S4:** The results of multipoint calibration in the updraft and downdraft reservoirs.

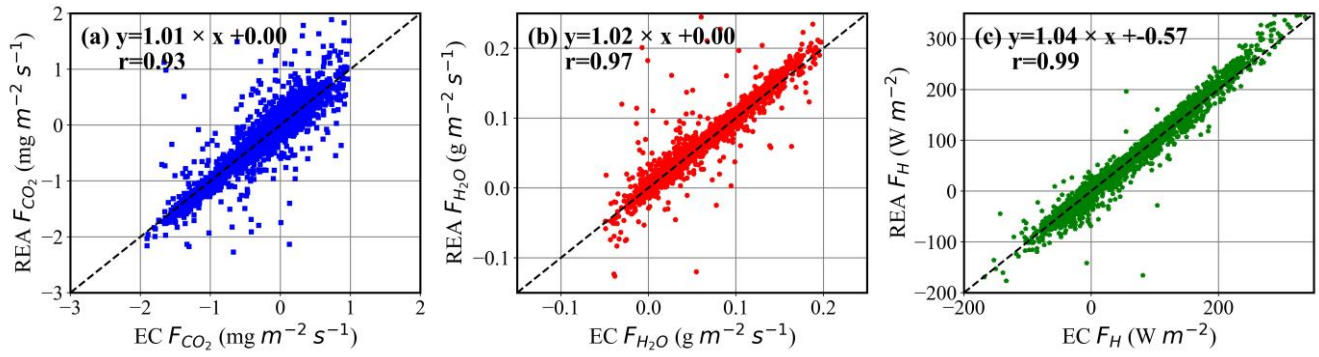

45 **Figure S5: The comparison of CO<sub>2</sub> (a), H<sub>2</sub>O (b) and heat (c) fluxes driven by EC theory and REA technique with a constant  $b = 0.60$  and  $w_0$ . The linear regressions and correlation coefficients ( $r$ ) between two fluxes are inset in each figure.**

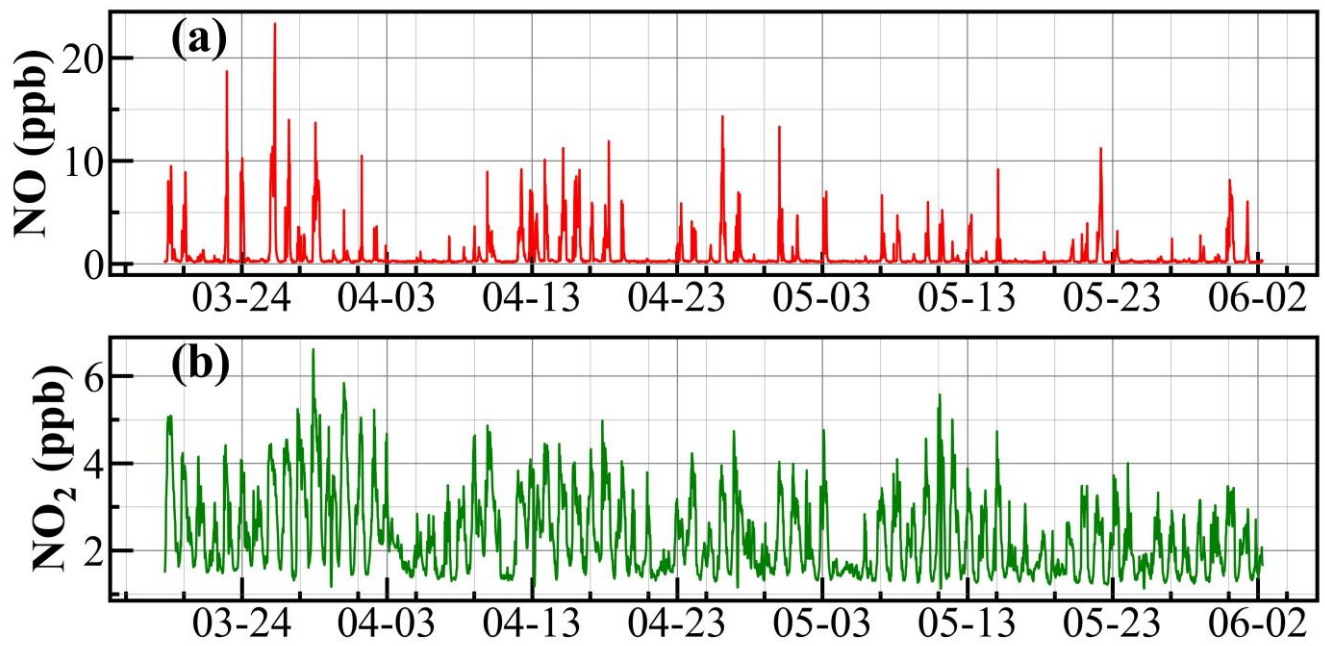

Figure S6: Timeseries of NO (a) and NO<sub>2</sub> (b) concentration from 18 March to 2 June.



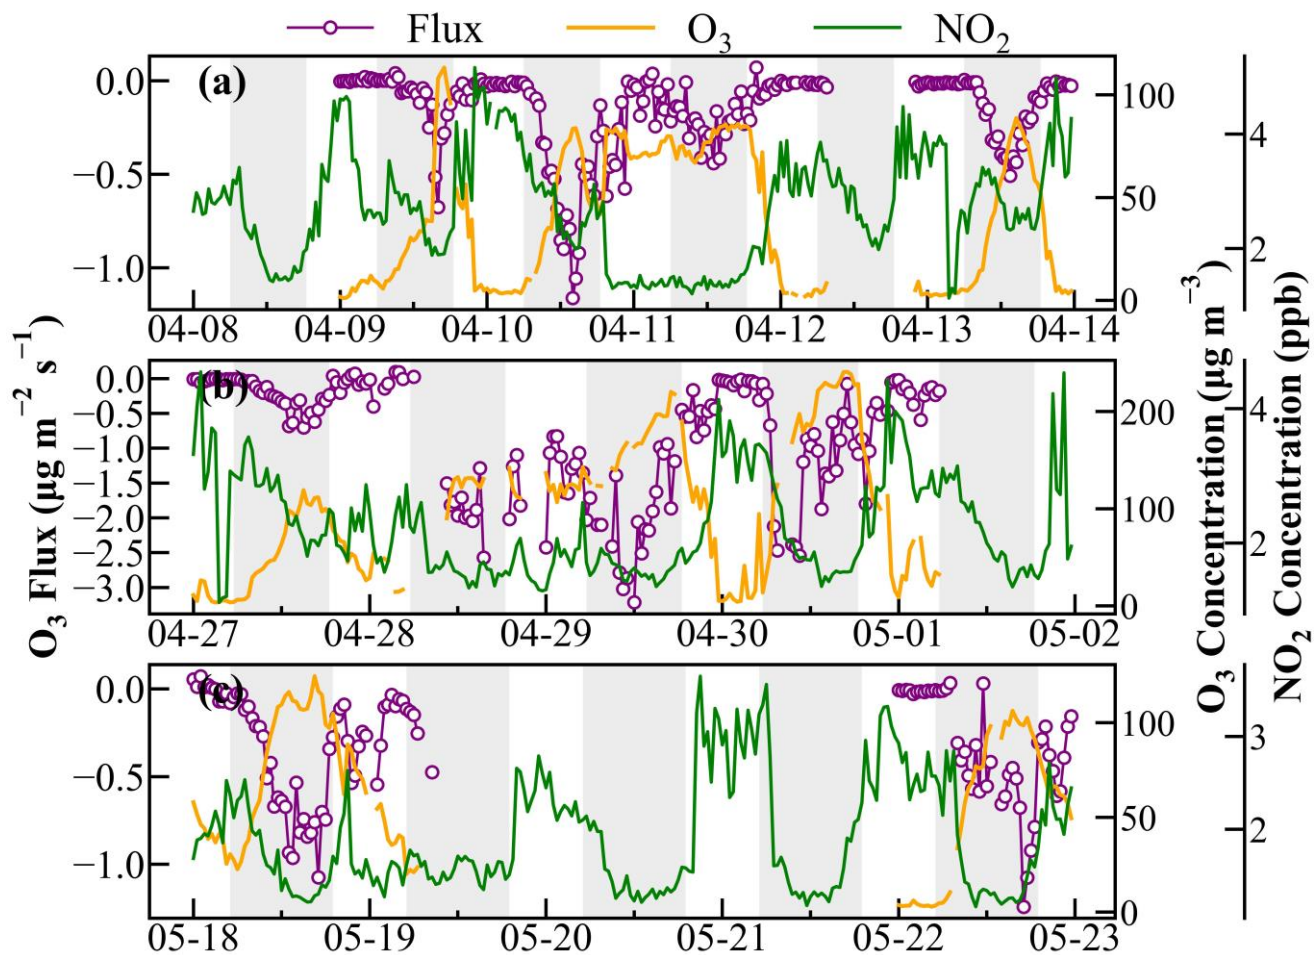

Figure S7: Variations of O<sub>3</sub> flux (purple lines), concentration (orange lines), NO<sub>2</sub> concentration (green lines) during (a) 8-13 April, (b) 27 April-1 May and (c) 18-22 May, with shades representing daytime hours.

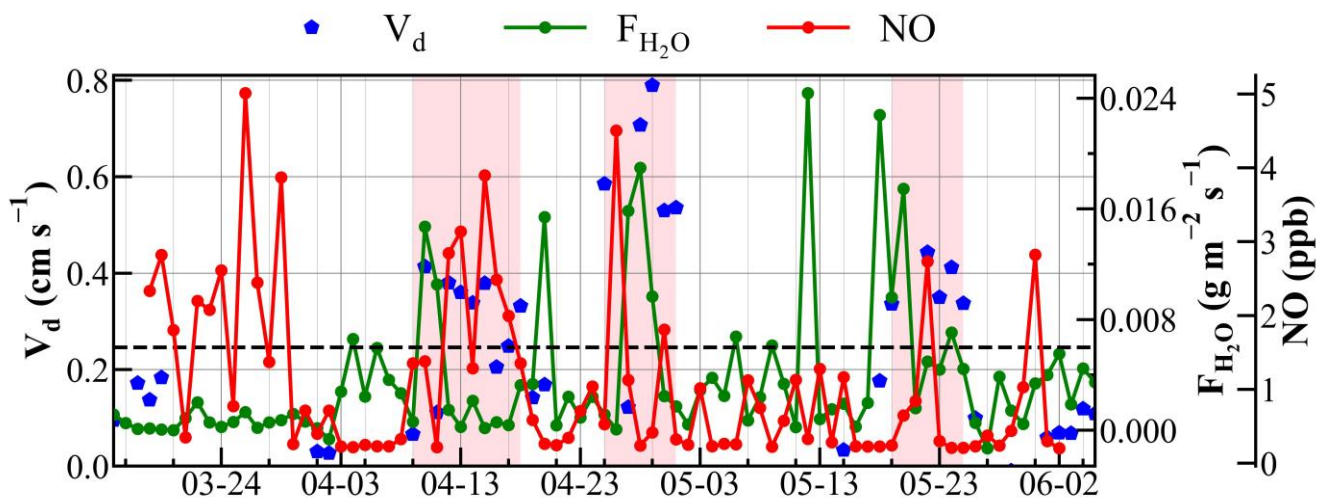

60 Figure S8: Variations of nighttime averaged O<sub>3</sub> deposition velocity ( $V_d$ , blue circle lines), H<sub>2</sub>O flux ( $F_{H_2O}$ , green lines) and NO concentration (red lines) during 18 March-2 June.

**Table S1: Winter wheat phenology at GC during 2022-2023.**

|              |            |            |            |            |            |            |            |
|--------------|------------|------------|------------|------------|------------|------------|------------|
| <b>Stage</b> | Sowing     | Emergence  | Three-leaf | Tillering  | Dormancy   | Greening   | Standing   |
| <b>Date</b>  | 2022.10.18 | 2022.10.28 | 2022.11.19 |            | 2022.11.29 | 2023.03.02 | 2023.03.21 |
| <b>Stage</b> | Elongation | Booting    | Heading    | Flowering  | Milk-ripe  | Ripening   | Harvest    |
| <b>Date</b>  | 2023.04.01 | 2023.04.15 | 2023.04.27 | 2023.05.05 | 2023.05.25 | 2023.06.11 | 2023.06.18 |

65 **Table S2: Summary of selected O<sub>3</sub> deposition velocity (V<sub>d</sub>).**

| Surface type | Date                   | Metrics            | V <sub>d</sub><br>(cm s <sup>-1</sup> ) | Site                       | Method          | References              |
|--------------|------------------------|--------------------|-----------------------------------------|----------------------------|-----------------|-------------------------|
| Wheat        | 2016.3.16-5.30         | Mean               | 0.39                                    | Nanjing, China             | EC              | (Xu et al., 2018)       |
|              | 2012.3.7-6.7           | Day Mean           | 0.42                                    | Yucheng, China             | EC              | (Zhu et al., 2015)      |
|              |                        | Night Mean         | 0.14                                    |                            |                 |                         |
| Maize        | 2011.8.9-9.28          | Day mean           | 0.29                                    | Yucheng, China             | EC              | (Zhu et al., 2014)      |
|              | 2002 summer            | Night mean         | 0.09                                    | Grignon, France            | EC              | (Lamaud et al., 2009)   |
|              |                        | Mean               | 0.5                                     |                            |                 |                         |
| Potato       | 2006 summer            | Mean               | 0.66                                    | Scotland, England          | EC              | (Coyle et al., 2009)    |
| Grassland    | May 2000               | Mean               | 0.22±0.22                               | Braunschweig, Germany      | EC              | (Mészáros et al., 2009) |
|              | May 2001- Nov. 2004    | Median             | 0.48±0.37                               | Scotland, England          | FG/EC           | (Coyle, 2005)           |
| Moorland     | 1995-1998              | Mean, at 0-40 ppb  | 0.75                                    | Auchencorth Moss, Scotland | FG/EC           | (Fowler et al., 2001)   |
|              | 1995-1998              | Mean, at 40-80 ppb | 0.4                                     |                            |                 |                         |
| Forest       | 2000-2009              | Range              | 0.11-0.42                               | Hyttiälä, Finland          | EC              | (Rannik et al., 2012)   |
|              | 1993-2000              | Median             | 0.30                                    | Massachusetts, America     | EC              | (Wu et al., 2015)       |
|              |                        |                    | 0.35                                    |                            | FG <sup>c</sup> |                         |
|              |                        |                    | 0.35                                    |                            | FG <sup>d</sup> |                         |
|              |                        |                    | 0.62                                    |                            | FG <sup>e</sup> |                         |
| Soil         | 2001.4.30-5.31         | Mean               | 0.21±0.21                               | La Crau, France            | EC              | (Stella et al., 2019)   |
|              | 2008-2010 <sup>a</sup> |                    | 0.29±0.33                               | Lamasquere, France         |                 |                         |
|              | 2007.10.19-2008.3.4    |                    | 0.26±0.20                               | La Cape Sud, France        |                 |                         |
|              | 2011.3.17-5.5          |                    | 0.36±0.28                               | Lusignan, France           |                 |                         |
|              | 2014.3.24-4.14         |                    | 0.61±0.48                               | Turro, Italy               |                 |                         |
| Sea          | 2006-2008              | Range              | 0.01-0.24                               | Gulf of Mexico             | EC              | (Bariteau et al., 2010) |
|              | 2006-2008              | Range              | 0.009-                                  | - <sup>b</sup>             | EC              | (Helmig et al.,         |

---

EC represents eddy covariance (EC) method, and FG refers flux-gradient (FG) approach.

<sup>a</sup> The specific observation periods includes 2008.4.24-5.26, 2008.11.20-12.18, 2009.11.14-2010.5.12 and 2010.9.29-11.9.

<sup>b</sup> The seas includes The Gulf of Mexico, Eastern Pacific Ocean, Western Atlantic Ocean and Southern Ocean.

<sup>c</sup> Modified micrometeorological gradient method.

70 <sup>d</sup> Modified Bowen ratio gradient method.

<sup>e</sup> Aerodynamic gradient method.

**Table S3: The relationships of O<sub>3</sub> deposition velocity ( $V_d$ ) and friction velocity ( $u^*$ ), soil volumetric water content (soil VWC) at different ranges of LAI.**

|                            |         | Slope | Intercept | Std. Err. | p-value | r    | n   |
|----------------------------|---------|-------|-----------|-----------|---------|------|-----|
| $V_d \sim u^*$             | LAI<1   | 0.84  | 0.09      | 0.32      | 0.00    | 0.39 | 158 |
|                            | 1≤LAI<2 | 1.13  | 0.04      | 0.67      | 0.00    | 0.45 | 48  |
|                            | 2≤LAI<3 | 2.36  | 0.01      | 0.40      | 0.00    | 0.57 | 282 |
|                            | LAI≥3   | 1.91  | 0.15      | 0.49      | 0.00    | 0.42 | 285 |
| $V_d \sim \text{soil VWC}$ | LAI>3.0 | 4.42  | -1.23     | 1.01      | 0.00    | 0.46 | 285 |
|                            | LAI>3.5 | 7.25  | -2.30     | 2.02      | 0.00    | 0.46 | 186 |
|                            | LAI>4.0 | 8.44  | -2.86     | 2.40      | 0.00    | 0.52 | 132 |
|                            | LAI>4.5 | 15.32 | -5.86     | 5.61      | 0.00    | 0.67 | 39  |

### Supplementary Method: The impact evaluation of the chemical reaction on O<sub>3</sub> flux measurement.

80 The comparison between the total residence time of the REA system and the chemical reaction time was used to evaluate to the influence of the chemical reaction on O<sub>3</sub> flux measurement. In the two shade channels, O<sub>3</sub> mainly reacted with NO, which could occur in minutes in agricultural fields (Zhang et al., 2024). In our study, since there was no simultaneous observation of the NO concentration in the two channels, we calculated the lifetime ( $\tau_{chem}$ ) of O<sub>3</sub> reacting with NO using the ambient NO concentration, and the actual  $\tau_{chem}$  in the two channels would be larger than the estimated values.

$$85 \quad \tau_{chem} = \frac{1}{C_{NO} \times k_r}, \quad \text{Eq. (S1)}$$

$$k_r = 0.444 \times \exp(1360/(T_{Air} + 273.15)), \quad \text{Eq. (S2)}$$

where  $C_{NO}$  is NO concentration, ppb;  $k_r$  is the reaction rate constant, ppb<sup>-1</sup> s<sup>-1</sup> (Walton et al., 1997);  $T_{Air}$  is the air temperature.

90 From 18 March to 2 June, NO concentration ranged from 0.1 ppb to 23.3 ppb with an average of  $0.8 \pm 1.8$  ppb. The calculated  $\tau_{chem}$  of O<sub>3</sub> in the atmosphere ranged from 141 s to 31559 s, with an average of 8893 s, which were remarkably higher than the total residence time (~ 10 s) from tip of the inlet to the point of O<sub>3</sub> detection the REA system. It indicated that the chemical O<sub>3</sub> consumption in the two channels would be minor and might have a marginal effect on flux measurements.

## 95 References

- Bariteau, L., Helmig, D., Fairall, C. W., Hare, J. E., Hueber, J., and Lang, E. K.: Determination of oceanic ozone deposition by ship-borne eddy covariance flux measurements, *Atmos. Meas. Tech.*, 3, 441-455, 10.5194/amt-3-441-2010, 2010.
- Coyle, M.: The gaseous exchange of ozone at terrestrial surfaces : non-stomatal deposition to grassland, *Agricultural and Forest Meteorology*, 149, 655-666, <https://doi.org/10.1016/j.agrformet.2008.10.020>, 2009.
- 100 Coyle, M., Nemitz, E., Storeton-West, R., Fowler, D., and Cape, J. N.: Measurements of ozone deposition to a potato canopy, *Agricultural and Forest Meteorology*, 149, 655-666, <https://doi.org/10.1016/j.agrformet.2008.10.020>, 2009.
- Fowler, D., Flechard, C., Cape, J. N., Storeton-West, R. L., and Coyle, M.: Measurements of Ozone Deposition to Vegetation Quantifying the Flux, the Stomatal and Non-Stomatal Components, *Water, Air, and Soil Pollution*, 130, 63-74, 10.1023/A:1012243317471, 2001.
- Helmig, D., Lang, E. K., Bariteau, L., Boylan, P., Fairall, C. W., Ganzeveld, L., Hare, J. E., Hueber, J., and Pallandt, M.: Atmosphere-ocean ozone fluxes during the TexAQS 2006, STRATUS 2006, GOMECC 2007, GasEx 2008, and AMMA 2008 cruises, *J. Geophys. Res.*
- 105 *Atmos.*, 117, <https://doi.org/10.1029/2011JD015955>, 2012.
- Lamaud, E., Loubet, B., Irvine, M., Stella, P., Personne, E., and Cellier, P.: Partitioning of ozone deposition over a developed maize crop between stomatal and non-stomatal uptakes, using eddy-covariance flux measurements and modelling, *Agricultural and Forest Meteorology*, 149, 1385-1396, <https://doi.org/10.1016/j.agrformet.2009.03.017>, 2009.
- Mészáros, R., Horváth, L., Weidinger, T., Neftel, A., Nemitz, E., Dämmgen, U., Cellier, P., and Loubet, B.: Measurement and modelling ozone fluxes over a cut and fertilized grassland, *Biogeosciences*, 6, 1987-1999, 10.5194/bg-6-1987-2009, 2009.
- 110 Rannik, Ü., Altimir, N., Mammarella, I., Bäck, J., Rinne, J., Ruuskanen, T. M., Hari, P., Vesala, T., and Kulmala, M.: Ozone deposition into a boreal forest over a decade of observations: evaluating deposition partitioning and driving variables, *Atmos. Chem. Phys.*, 12, 12165-12182, 10.5194/acp-12-12165-2012, 2012.
- Stella, P., Loubet, B., de Berranger, C., Charrier, X., Ceschia, E., Gerosa, G., Finco, A., Lamaud, E., Serça, D., George, C., and Ciuraru, R.: Soil ozone deposition: Dependence of soil resistance to soil texture, *Atmos. Environ.*, 199, 202-209, 10.1016/j.atmosenv.2018.11.036, 2019.
- 115 Walton, S., Gallagher, M. W., and Duyzer, J. H.: Use of a detailed model to study the exchange of NO<sub>x</sub> and O<sub>3</sub> above and below a deciduous canopy, *Atmos. Environ.*, 31, 2915-2931, [https://doi.org/10.1016/S1352-2310\(97\)00126-X](https://doi.org/10.1016/S1352-2310(97)00126-X), 1997.
- Wu, Z. Y., Zhang, L., Wang, X. M., and Munger, J. W.: A modified micrometeorological gradient method for estimating O<sub>3</sub> dry depositions over a forest canopy, *Atmos. Chem. Phys.*, 15, 7487-7496, 10.5194/acp-15-7487-2015, 2015.
- 120 Xu, J., Zheng, Y., Mai, B., Zhao, H., Chu, Z., Huang, J., and Yuan, Y.: Simulating and partitioning ozone flux in winter wheat field: the Surf-atm-O<sub>3</sub> model (in Chinese), *China Environmental Science* 38, 455-470, 2018.
- Zhang, C., Wang, J., Zhang, Y., Xu, W., Zhang, G., Miao, G., Zhou, J., Yu, H., Zhao, W., Lin, W., Kang, L., Cai, X., Zhang, H., and Ye, C.: Improving model representation of rapid ozone deposition over soil in the central Tibetan Plateau, *Environmental Science: Atmospheres*, 4, 252-264, 10.1039/D3EA00153A, 2024.
- 125 Zhu, Z., Sun, X., Zhao, F., and Meixner, F. X.: Ozone concentrations, flux and potential effect on yield during wheat growth in the Northwest-Shandong Plain of China, *Journal of Environmental Sciences*, 34, 1-9, <https://doi.org/10.1016/j.jes.2014.12.022>, 2015.
- Zhu, Z., Sun, X., Dong, Y., Zhao, F., and Meixner, F. X.: Diurnal variation of ozone flux over corn field in Northwestern Shandong Plain of China, *Science China Earth Sciences*, 57, 503-511, 10.1007/s11430-013-4797-9, 2014.

130
